# Supplementary material for: Src/CK2/PTEN-Mediated GluN2B and CREB Dephosphorylations Regulate the Responsiveness to AMPA Receptor Antagonists in Chronic Epilepsy Rats
Source: MDPI journal article supplement (doi:10.3390/ijms21249633), 2020-12-17
Supplement: s1 [file s1]

Supplementary information

**Src/CK2/PTEN-mediated GluN2B and CREB dephosphorylations  
regulate the response to AMPA receptor antagonist in chronic epilepsy rats**

Ji-Eun Kim<sup>1,2</sup>, Duk-Shin Lee, Hana Park<sup>1,2</sup>, and Tae-Cheon Kang<sup>1,2\*</sup>

<sup>1</sup>Department of Anatomy and Neurobiology, College of Medicine, Hallym University, Chuncheon 24252,  
South Korea

<sup>2</sup>Institute of Epilepsy Research, College of Medicine, Hallym University, Chuncheon 24252, South Korea

\* Correspondence to: T. -C. Kang, Department of Anatomy and Neurobiology, College of Medicine, Hallym University, Chuncheon, Kangwon-Do 24252, South Korea; Tel: +82-33-248-2524; Fax: +82-33-248-2525; E-mail: tckang@hallym.ac.kr

Supplementary Table 1. Average of weight and consumptions of food and water in each group

| Group                         | Weight<br>(g) | Food consumption<br>(g/day) | Water consumption<br>(ml/day) |
|-------------------------------|---------------|-----------------------------|-------------------------------|
| Control                       | 341 ± 28.1    | 32 ± 7.3                    | 34 ± 5.5                      |
| Epilepsy (Vehicle)            | 317 ± 33.5    | 34 ± 8.1                    | 28 ± 4.8                      |
| Responder<br>(perampanel)     | 324 ± 19.3    | 29 ± 12.4                   | 26 ± 7.9                      |
| Responder<br>(GYKI 52466)     | 309 ± 21.8    | 27 ± 6.8                    | 31 ± 3.8                      |
| Non-responder<br>(perampanel) | 298 ± 35.9    | 28. ± 9.4                   | 28 ± 6.2                      |
| Non-responder<br>(GYKI 52466) | 301 ± 32.1    | 31. ± 7.7                   | 32 ± 4.2                      |

Mean ± SD; No statistical significance in each group.

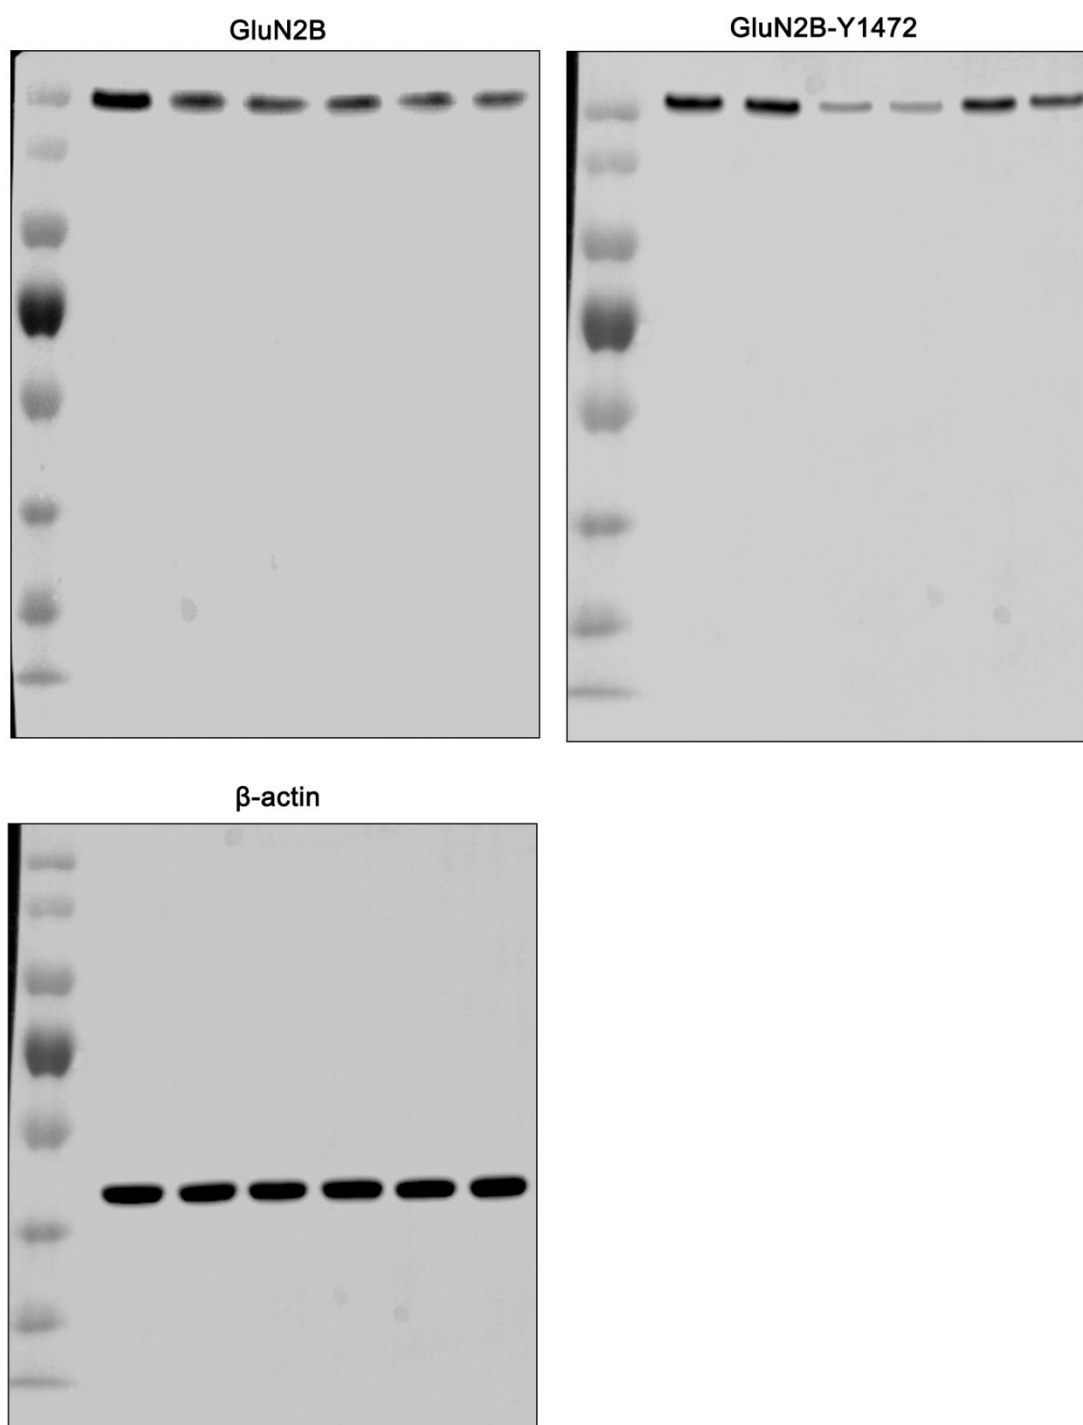

Supplementary Figure 1. Representative full-gel images of Western blots in Figure 2A.

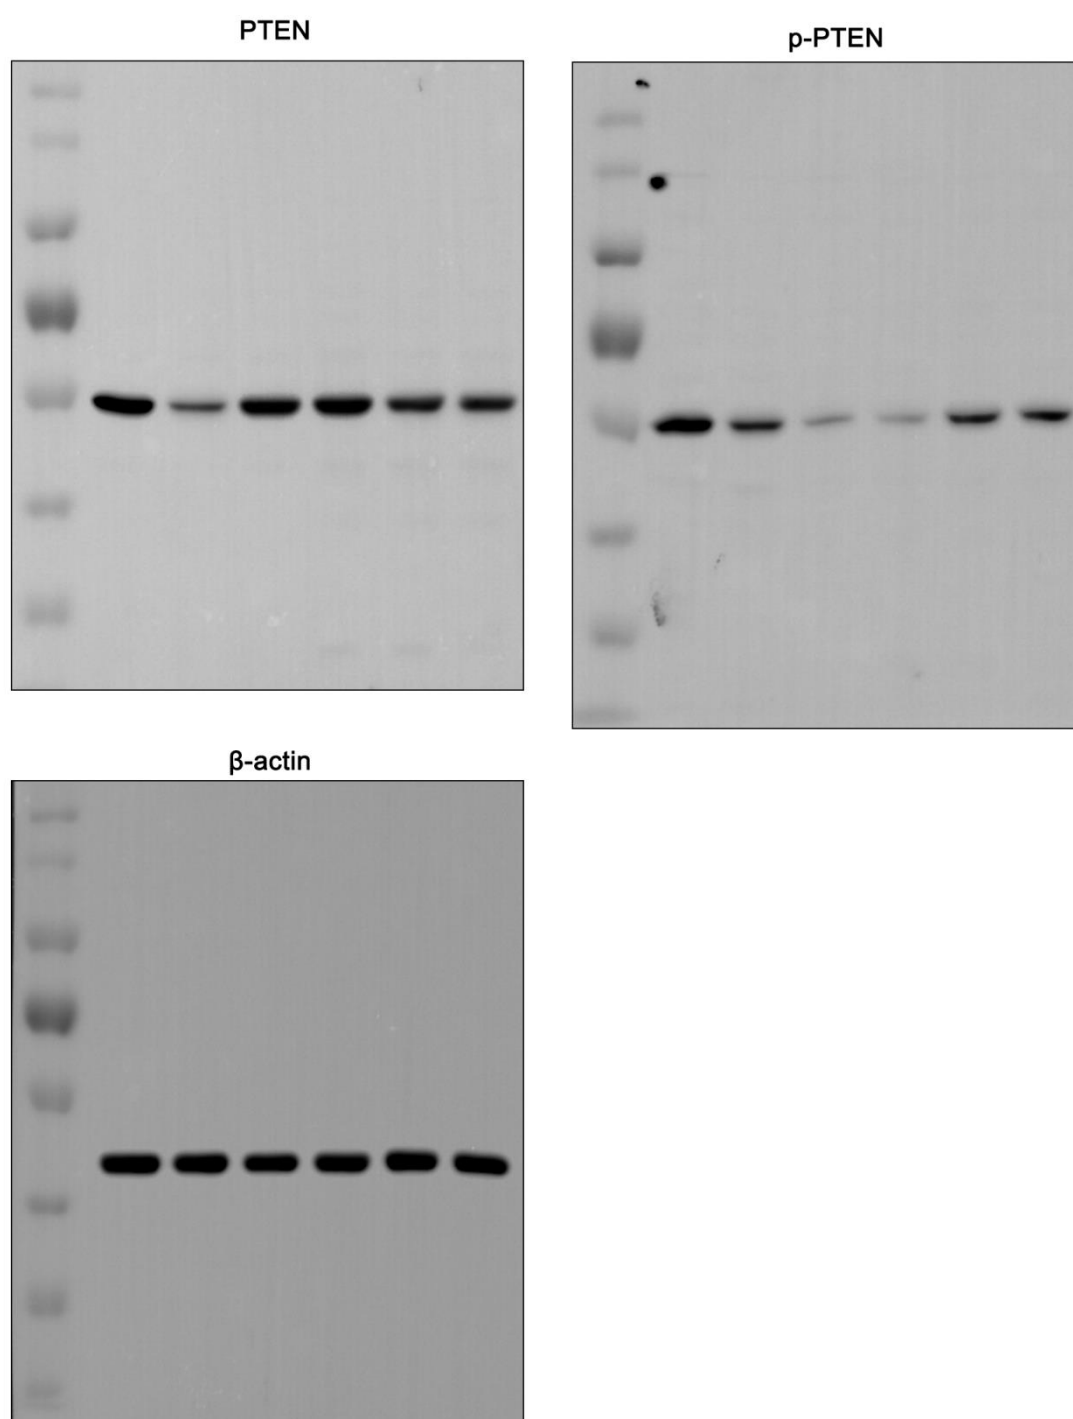

Supplementary Figure 2. Representative full-gel images of Western blots in Figure 3A.

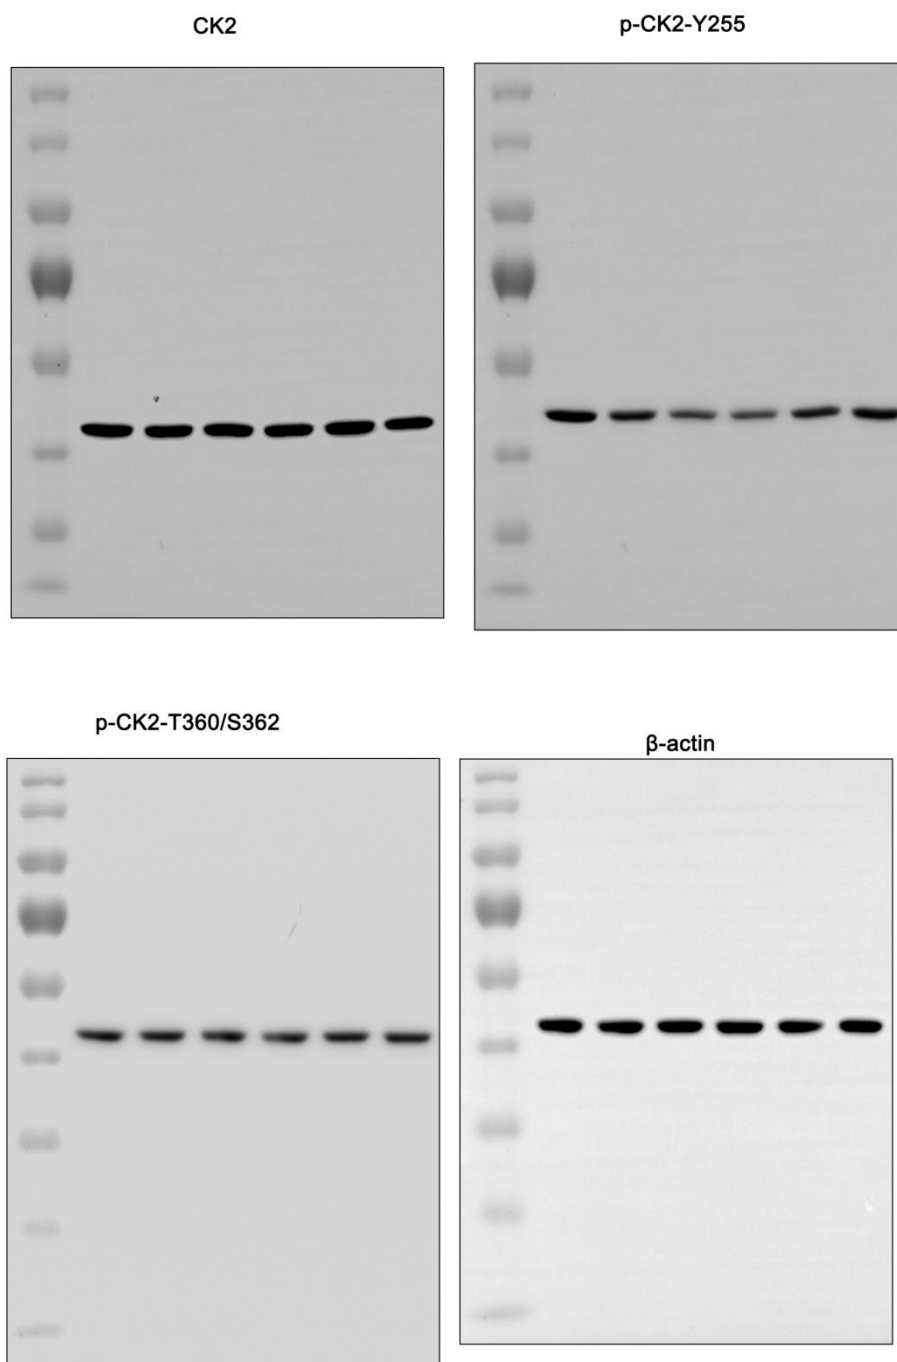

Supplementary Figure 3. Representative full-gel images of Western blots in Figure 4A.

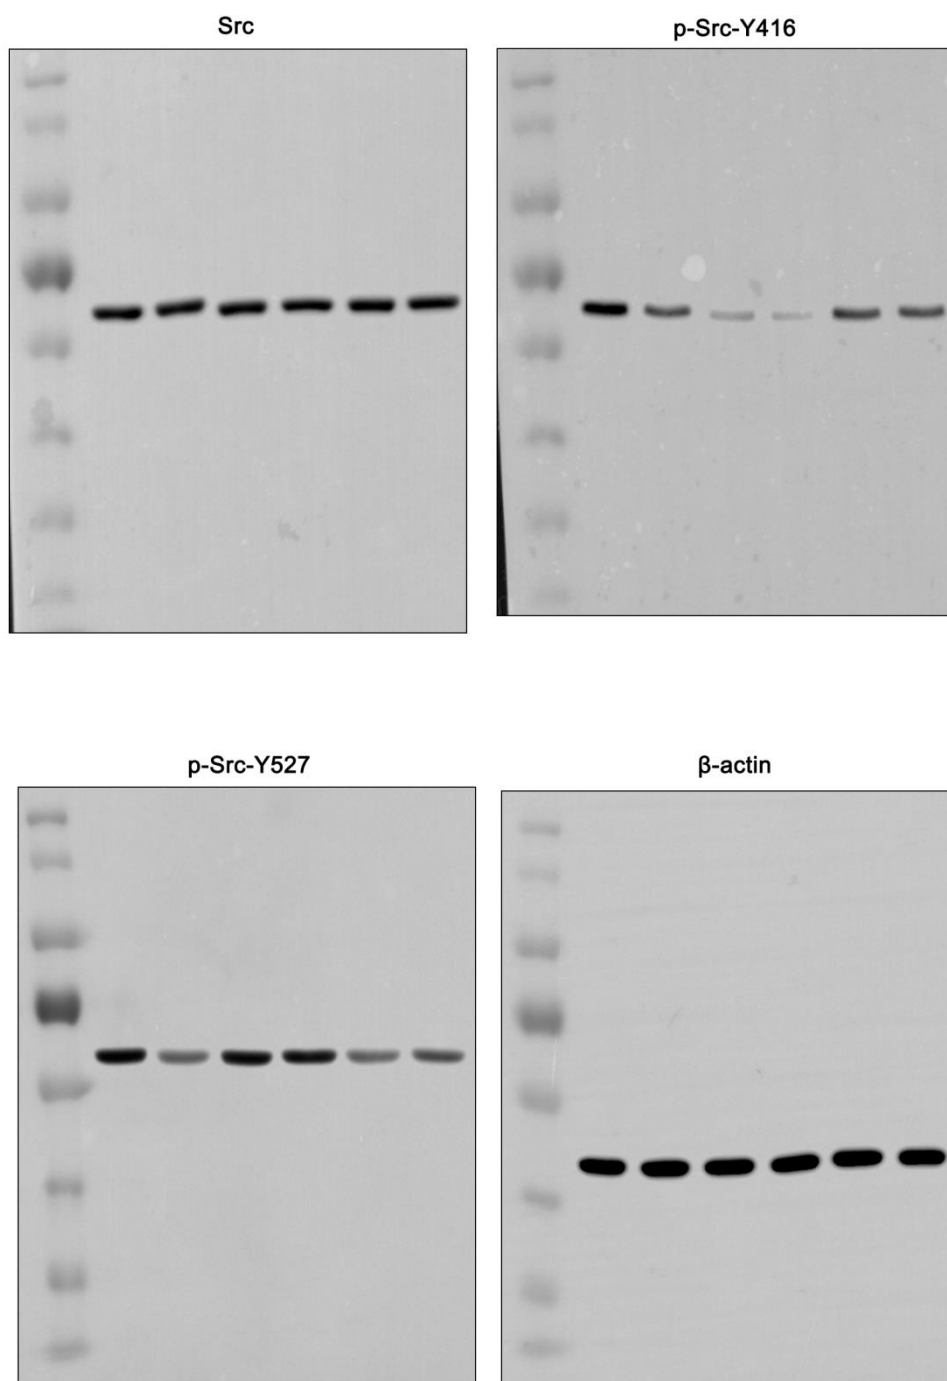

Supplementary Figure 4. Representative full-gel images of Western blots in Figure 5A.

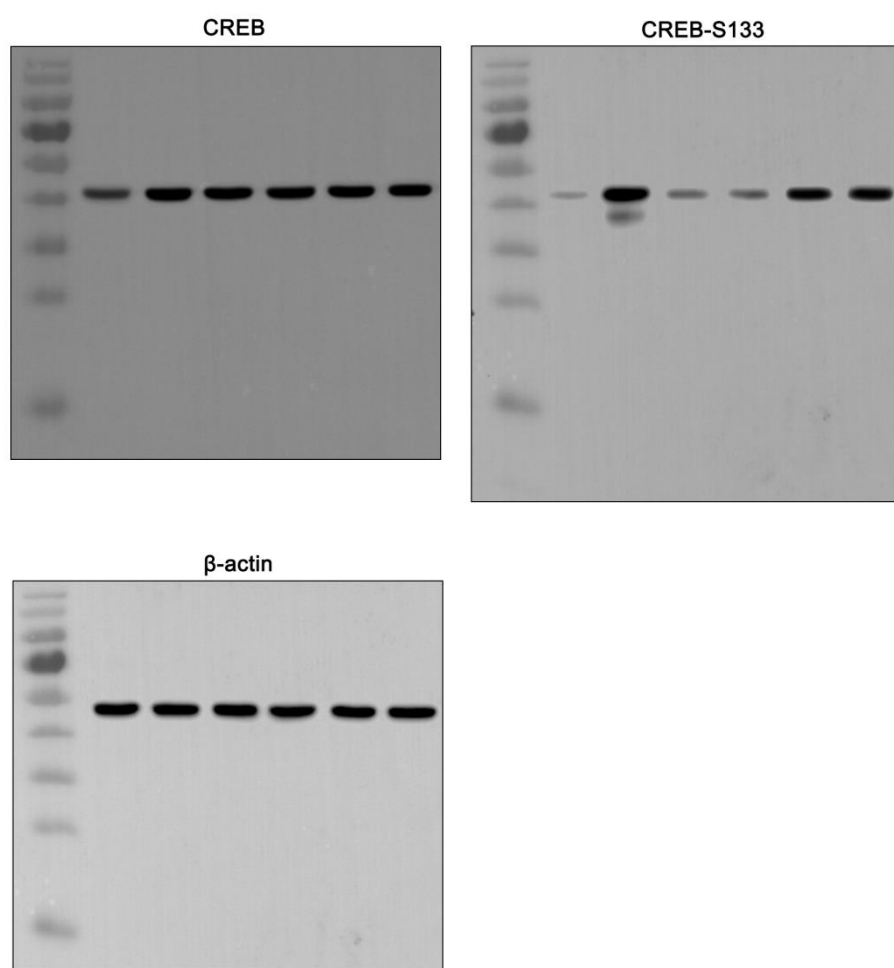

Supplementary Figure 5. Representative full-gel images of Western blots in Figure 6A.

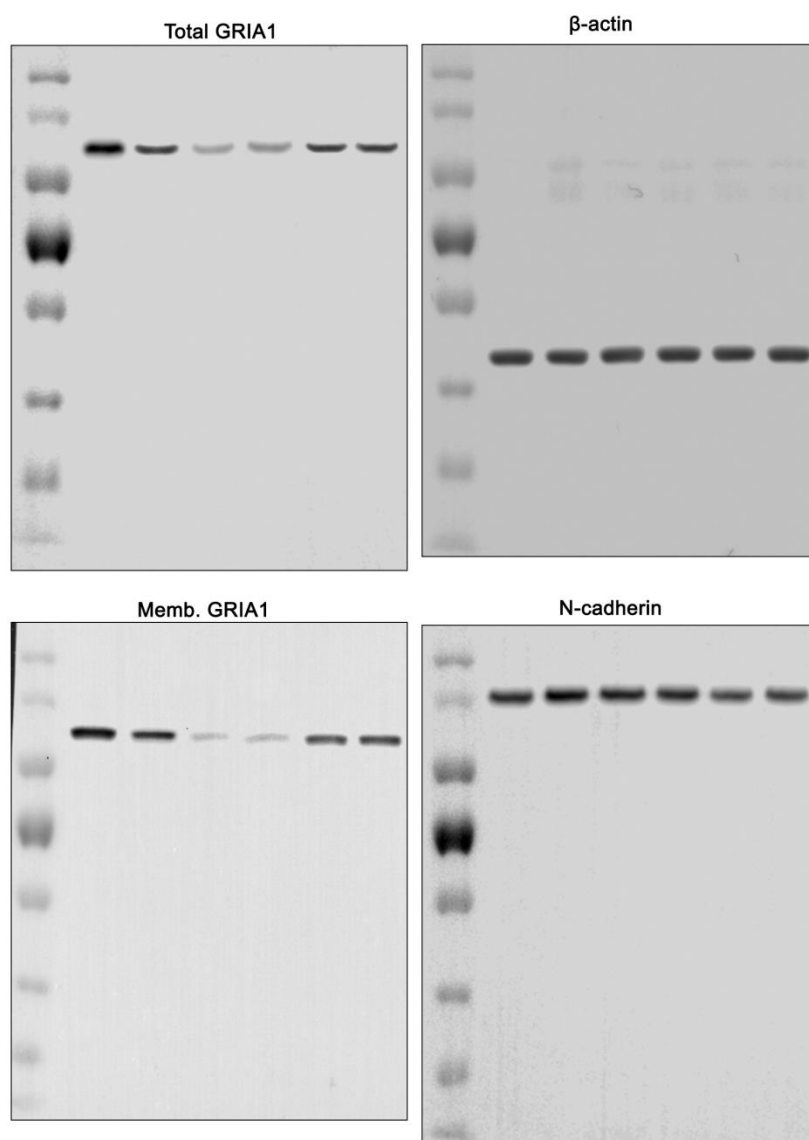

Supplementary Figure 6. Representative full-gel images of Western blots in Figure 7A.
